# Supplementary material
Source: publisher figshare collection journal article supplement (https://acs.figshare.com/ndownloader/files/4471387)
Supplement: Supplementary file 1 [file 4471387]

# Femtosecond fluorescence dynamics of a proton transfer dye interacting with silica-based nanomaterials

Boiko Cohen<sup>†</sup>, Shufeng Wang<sup>†a</sup>, Juan Angel Organero, Leandra del Campo<sup>#</sup>, Felix Sanchez<sup>#</sup> and Abderrazzak Douhal<sup>†\*</sup>

<sup>†</sup>Departamento de Química Física, Sección de Químicas, Facultad del Medio Ambiente, ,  
Universidad de Castilla-La Mancha, Avenida Carlos III, S.N., 45071 Toledo, Spain.

<sup>#</sup>Instituto de Química Orgánica, CSIC, Juan de la Cierva, 3, 28006, Madrid, Spain.

<sup>a</sup> On leave from the Department of Physics, Peking University, Beijing 100871, China.

\*corresponding author: [Abderrazzak.Douhal@uclm.es](mailto:Abderrazzak.Douhal@uclm.es)

Fax: +34-925-268840.

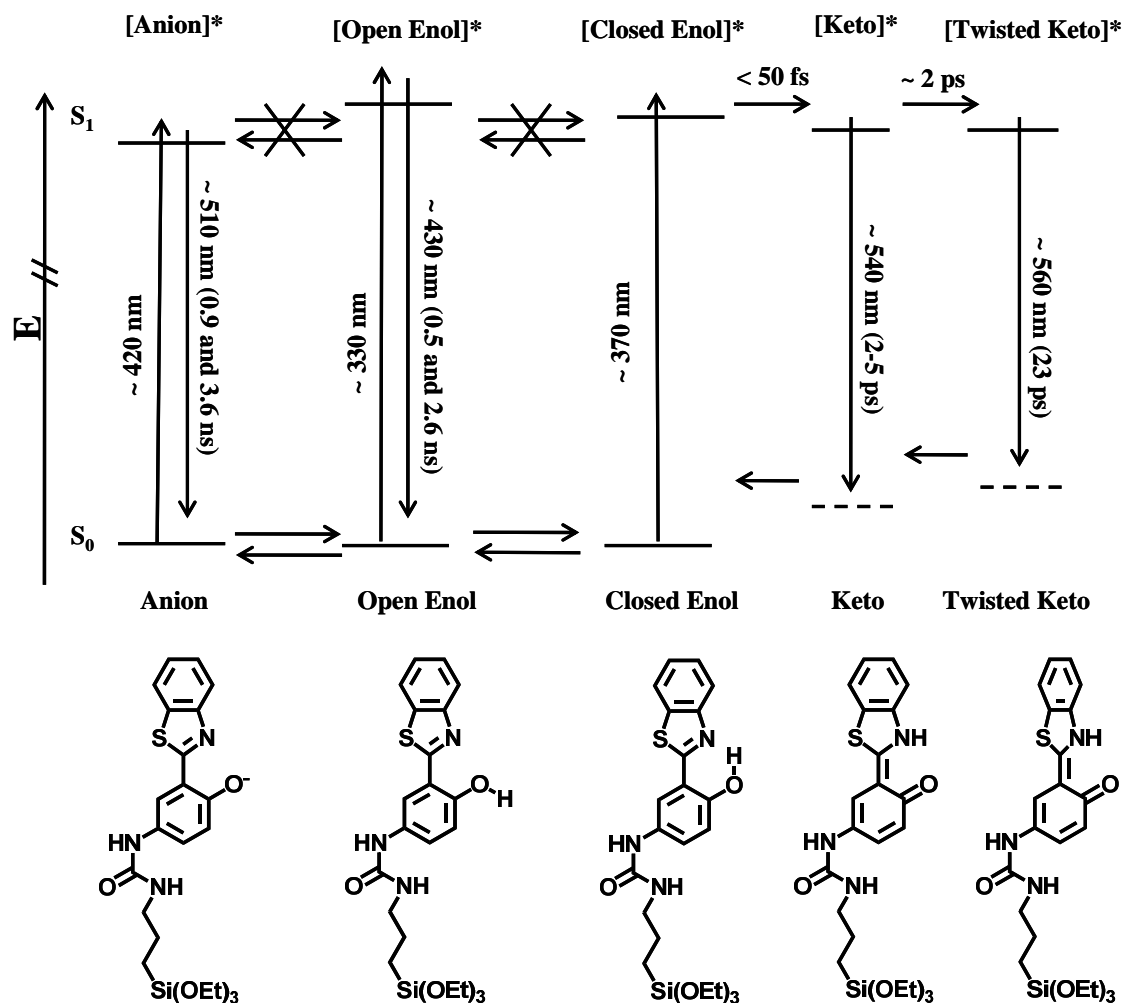

**SI Scheme 1.** Relevant photophysical data of the photoreactions involved in HBTNH2 in acetonitrile solutions. After excitation of the closed enol conformer, an excited state intramolecular process occurs in less than 50 fs to produce the keto structure. This keto one can emits in 2-5 ps and twists in ~ 2 ps to give a twister conformer, which relax to the electronic ground state by fluorescence in 23 ps. Finally, we suggest that the proton in the keto tautomers is transferred back to the initial closed enol structure in a thermal process. In addition to that, optical excitations of the so called open enol from where the OH group of the dye has established intermolecular H-bonds with the solvent molecules, and of the anion structure where the proton has shifted to the solvent produce excited open enol and anion (phenolate type) species that are not in equilibrium at the excited state, contrary to the situation at the ground state. Both return to the electronic ground state by fluorescence in 0.5 and 2.6, and 0.9 and 3.6 ns, respectively. Note that the relative energy levels of  $S_0$  and  $S_1$  are not in scale.

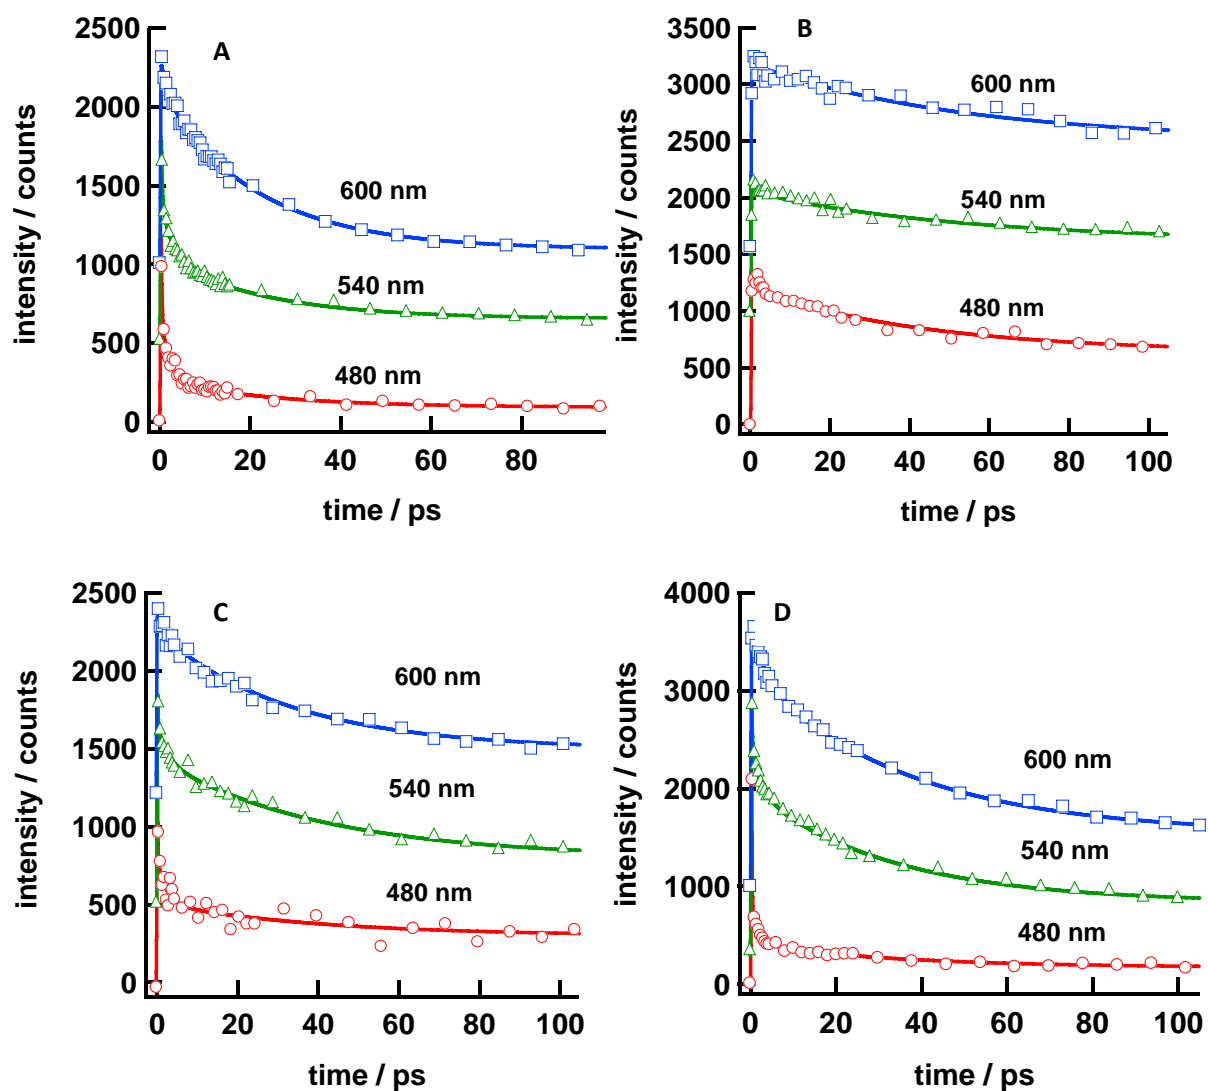

**SI Figure 1.** Fluorescence up-conversion transients of (A) HBTNH<sub>2</sub>, (B) HBTNH<sub>2</sub>-(Al)MCM-41, (C) HBTNH<sub>2</sub>-MCM-41 and (D) HBTNH<sub>2</sub>-Si in acetonitrile solution at three selected emission wavelengths (as indicated). The solid lines represent the nonlinear least square fits, and the relevant parameters of the multi-exponential fits ( $\tau_i$  and  $a_i$ ) are given in tables 1 and 2 in the main manuscript.

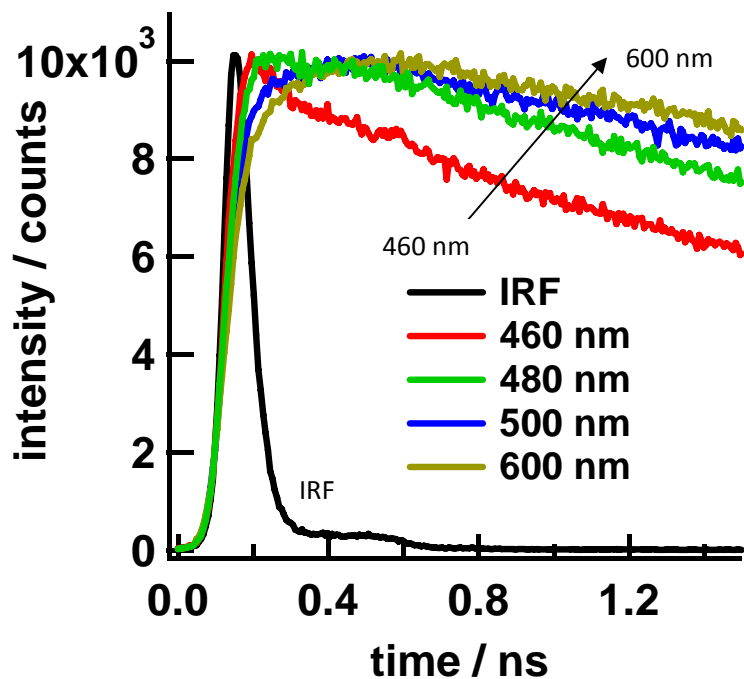

**SI Figure 2.** Representative time-correlated single-photon counting emission decays of HBTNH2 in acetonitrile solution in presence of KOH (at the indicated wavelengths). The excitation wavelength was 371 nm. The IRF ( $\sim 80$  ps) was measured as scattered laser light from a Ludox solution.

**SI. Table 1A:** Fluorescence lifetimes ( $\tau_i$ ) and relative contributions ( $a_i$ ) in the emission decays of HBTNH2 in acetonitrile. The data were obtained by using a bi-exponential function to fit the signal from the time-correlated single-photon counting measurements upon excitation at 371 nm and gating the enol emission band (see Figure 1B).

| $\lambda/\text{nm}$ | $\tau_1/\text{ps}$ | $a_1 \%$ | $\tau_2/\text{ns}$ | $a_2 \%$ |
|---------------------|--------------------|----------|--------------------|----------|
| 435                 | 0.5                | 5        | 2.6                | 95       |
| 445                 | 0.5                | 6        | 2.6                | 94       |
| 460                 | 0.5                | 6        | 2.6                | 94       |
| 480                 | 0.5                | 9        | 2.6                | 91       |

**SI Table 1B:** Fluorescence lifetimes ( $\tau_i$ ) and relative contributions ( $a_i$ ) in the emission decays of HBTNH2 in acetonitrile. The data were obtained by using a multi-exponential function to fit the signal from the time-correlated single-photon counting measurements upon excitation at 371 nm and gating the anion and keto emission bands (see Figure 1B).

| $\lambda/\text{nm}$ | $\tau_1/\text{ps}$ | $a_1 \%$ | $\tau_2/\text{ns}$ | $a_2 \%$ | $\tau_3/\text{ns}$ | $a_3 \%$ |
|---------------------|--------------------|----------|--------------------|----------|--------------------|----------|
| 510                 | 23                 | 45       | 0.9                | 15       | 3.6                | 40       |
| 530                 | 23                 | 65       | 0.9                | 10       | 3.6                | 25       |
| 550                 | 23                 | 90       | 0.9                | 7        | 3.6                | 3        |
| 640                 | 23                 | 98       | 0.9                | 2        | -                  | -        |

**Acknowledgments.** This work was supported by the JCCM and MICINN through projects PCI08-5868, UNCM05-23-025 and MAT2008-01609, respectively. BC thanks the MICINN for the Ramon y Cajal fellowship, and SW thanks the UCLM for his stay fellowship.
